# Supplementary material for: Differentially Expressed Extracellular Vesicle, Exosome and Non-Exosome miRNA Profile in High and Low Tick-Resistant Beef Cattle
Source: Front Cell Infect Microbiol. 2021 Dec 17;11:780424. doi: 10.3389/fcimb.2021.780424 (PMC8718928; doi:10.3389/fcimb.2021.780424)
Supplement: Supplementary file 3 [file DataSheet_3.xlsx]

## Sheet: Shared genes_miRNA target
Gene	Gene name	Shared target prediction tools
CDC73	cell division cycle 73	TargetScan, miRmapper, miRanda
ABCD1	ATP Binding Cassette Subfamily D Member 1	miRmapper, miRanda
ALKBH4	AlkB Homolog 4, Lysine Demethylase	miRmapper, miRanda
ATP6V1G1	ATPase, H+ transporting, lysosomal 13kDa, V1 subunit G1	TargetScan, miRmapper
BSG	Basigin (Ok Blood Group)	miRmapper, miRanda
CASR	Calcium Sensing Receptor	miRmapper, miRanda
CDCA8	Cell Division Cycle Associated 8	miRmapper, miRanda
CNP	2',3'-Cyclic Nucleotide 3' Phosphodiesterase	miRmapper, miRanda
DDX19A	DEAD-Box Helicase 19A	miRmapper, miRanda
ELMOD1	ELMO/CED-12 domain containing 1	TargetScan, miRmapper
FBXO36	F-Box Protein 36	miRmapper, miRWalk
FGD5	FYVE, RhoGEF And PH Domain Containing 5	miRmapper, miRanda
FKBP1B	FK506 binding protein 1B, 12.6 kDa	TargetScan, miRmapper
FLOT1	Flotillin 1	miRmapper, miRanda
GANAB	Glucosidase II Alpha Subunit	miRmapper, miRanda
GLUL	Glutamate-Ammonia Ligase	miRanda, miRWalk
GUCD1	guanylyl cyclase domain containing 1	TargetScan, miRanda
IL16	interleukin 16	TargetScan, miRmapper
IQCK	IQ Motif Containing K	miRmapper, miRanda
LHX9	LIM homeobox 9	TargetScan, miRmapper
NCKAP1L	NCK Associated Protein 1 Like	miRmapper, miRWalk
PI15	Peptidase Inhibitor 15	miRmapper, miRanda
PLXDC2	plexin domain containing 2	TargetScan, miRmapper
PPP4R1	Protein Phosphatase 4 Regulatory Subunit 1	miRmapper, miRanda
RAD51D	RAD51 paralog D	TargetScan, miRmapper
RNF144B	Ring Finger Protein 144B	miRmapper, miRWalk
ROBO2	roundabout, axon guidance receptor, homolog 2 (Drosophila)	TargetScan, miRmapper
SELT	Selenoprotein T	TargetScan, miRmapper
SNF8	SNF8 Subunit Of ESCRT-II	miRmapper, miRWalk
SPRED1	sprouty-related, EVH1 domain containing 1	TargetScan, miRmapper
ST13	ST13 Hsp70 Interacting Protein	miRmapper, miRanda
TCTA	T Cell Leukemia Translocation Altered	miRmapper, miRanda
TEKT3	Tektin 3	miRmapper, miRanda
TRAK1	Trafficking Kinesin Protein 1	miRanda, miRWalk
UBE2G2	Ubiquitin Conjugating Enzyme E2 G2	miRmapper, miRanda
UBE2V1	Ubiquitin Conjugating Enzyme E2 V1	miRmapper, miRanda
ZNF48	Zinc Finger Protein 48	miRmapper, miRanda
